# Supplementary material for: Rehabilitation Profiles of Older Adult Stroke Survivors Admitted to Intermediate Care Units: A Multi-Centre Study
Source: PLoS One. 2016 Nov 9;11(11):e0166304. doi: 10.1371/journal.pone.0166304 (PMC5102428; doi:10.1371/journal.pone.0166304)
Supplement: S1 Data — (XLS) [file pone.0166304.s001.xls]

## Sheet: Sheet1
Age	Alcohol	Aphasia	Barthel at discharge	Begun RHB at acute hospital	Carregiver presence	Charlson index	Dicharge destination	Dysphagia	Functional improvement	Relative functional Gain	LOS	NIHSS	PEG	Post-stroke Barthel	Pre-stroke Barthel	Previous CV disease	Previous DBM	Previous Dementia	Previous DLP	Previous institutionalization	Presure Ulcers	Referral center	RHB Efficiency	RLAS	Sex	Smoke	SNG	Stroke type
74.7214	0	1	85	1	1	5	1	0	35	3.5	33	8	0	50	60	1	0	0	1	0	0	1	1.06061	8	1	0	0	0
85.2567	#NULL!	0	75	1	1	3	1	0	65	2.16667	36	0	0	10	40	1	0	1	1	0	0	1	1.80556	7	1	0	0	0
67.5811	0	0	85	1	1	0	1	0	85	2.125	27	15	0	0	40	0	0	0	0	0	0	1	3.14815	8	1	0	0	0
76.0438	0	1	85	0	0	2	1	1	10	2	38	6	0	75	80	1	1	0	1	0	0	1	0.263158	7	0	1	0	0
87.6742	0	0	100	0	0	2	1	0	25	1.66667	46	4	0	75	90	0	1	0	1	0	0	3	0.543478	8	0	1	0	0
68.7885	0	0	60	1	1	11	3	1	40	1.6	100	2	0	20	45	0	1	0	1	0	1	1	0.4	6	0	1	0	1
83.3539	0	1	50	0	0	3	0	0	40	1.6	41	4	0	10	35	0	0	1	1	1	0	1	0.97561	6	0	1	0	0
87.8029	0	0	100	1	0	1	1	0	15	1.5	23	1	0	85	95	1	0	0	0	0	0	1	0.652174	7	1	0	0	1
74.8008	0	1	60	0	0	4	1	0	55	1.375	36	6	0	5	45	0	1	1	1	0	0	1	1.52778	5	1	0	0	0
59.5264	0	0	100	1	0	1	1	0	70	1.27273	103	6	0	30	85	0	1	0	0	0	0	1	0.679612	8	1	1	0	0
68.8405	0	0	85	1	1	0	1	1	75	1.15385	65	13	0	10	75	0	0	0	1	0	0	1	1.15385	7	0	1	0	0
65.473	0	0	55	0	1	6	1	1	50	1.11111	45	4	0	5	50	0	0	0	1	0	0	1	1.11111	8	1	0	0	0
80.8624	0	0	85	0	1	5	0	0	85	1.0625	154	12	0	0	80	0	0	1	0	0	0	1	0.551948	3	0	0	0	0
95.6194	0	0	10	0	1	2	0	0	5	1	71	1	0	5	10	0	1	0	0	0	0	1	0.0704225	7	1	0	0	0
79.8713	0	0	85	1	0	1	1	0	50	1	59	1	0	35	85	0	0	0	0	0	0	1	0.847458	8	1	0	0	0
84.2409	0	0	85	0	0	2	1	0	45	1	27	2	0	40	85	0	0	0	1	0	0	1	1.66667	8	1	1	0	0
54.5161	0	0	75	1	0	4	#NULL!	0	40	1	139	1	0	35	75	0	0	0	0	0	0	1	0.28777	8	1	0	0	1
69.0623	0	0	100	1	1	1	#NULL!	1	45	1	98	2	0	55	100	0	0	0	1	0	0	1	0.459184	8	1	0	0	1
72.2382	0	0	95	0	0	1	1	0	5	1	27	2	0	90	95	0	0	0	0	0	0	1	0.185185	8	0	1	0	0
59.4114	0	1	100	1	0	5	1	1	35	1	147	7	0	65	100	0	0	0	0	0	0	1	0.238095	7	1	1	0	1
79.7591	0	0	100	1	0	3	1	1	40	1	40	0	0	60	100	0	0	0	0	0	0	1	1	8	0	1	0	0
79.3895	0	0	100	0	1	2	1	0	50	1	55	2	0	50	100	0	1	0	1	0	0	1	0.909091	8	1	0	0	0
88.2136	0	0	100	1	1	4	1	0	40	1	19	0	0	60	100	1	0	0	0	0	0	1	2.10526	8	0	1	0	0
73.9329	0	0	100	0	0	4	1	0	30	1	45	2	0	70	100	1	0	0	1	0	0	1	0.666667	8	0	1	0	0
78.204	0	0	100	0	1	4	1	0	45	1	48	9	0	55	100	0	0	0	1	0	0	1	0.9375	8	1	0	0	1
70.0096	0	0	100	0	1	0	1	0	10	1	8	0	0	90	100	0	0	0	1	0	0	1	1.25	8	1	0	0	0
74.7296	1	0	100	1	1	0	1	0	15	1	28	0	0	85	100	0	0	0	1	0	0	1	0.535714	8	0	1	0	0
76.1862	0	0	100	0	1	2	1	1	55	1	50	1	0	45	100	1	1	0	1	0	0	1	1.1	8	1	0	0	0
61.7632	1	0	100	0	0	1	1	0	75	1	41	1	0	25	100	0	0	0	0	0	0	1	1.82927	6	0	1	0	1
42.13	1	1	100	0	0	5	1	0	80	1	33	1	0	20	100	1	0	0	0	0	0	1	2.42424	7	0	1	0	1
63.5017	0	0	100	1	0	2	1	0	55	1	134	6	0	45	100	0	0	0	0	0	0	2	0.410448	8	1	1	0	1
74.5435	1	0	100	0	0	1	1	0	50	1	17	0	0	50	100	1	0	0	0	0	0	1	2.94118	8	0	1	0	0
65.8836	1	1	100	1	1	4	1	0	70	1	122	5	0	30	100	0	1	0	0	0	0	1	0.57377	8	0	1	0	0
68.3778	0	0	100	1	1	0	1	0	60	1	24	3	0	40	100	0	0	0	1	0	0	1	2.5	8	0	1	0	1
74.4613	0	0	100	1	1	2	1	0	25	1	32	0	0	75	100	1	0	0	1	0	0	1	0.78125	8	1	1	0	0
70.0507	0	0	100	1	1	2	1	1	25	1	27	2	0	75	100	0	1	1	0	0	0	1	0.925926	8	1	0	0	0
86.4942	0	0	100	1	1	3	1	0	20	1	28	4	0	80	100	0	1	1	0	0	0	1	0.714286	8	0	0	0	0
73.4757	0	0	100	0	0	2	1	0	15	1	23	0	0	85	100	0	0	0	0	0	0	1	0.652174	7	0	1	0	0
73.3196	0	0	100	0	1	2	1	0	15	1	28	0	0	85	100	0	1	0	1	0	0	1	0.535714	8	1	0	0	1
79.7481	0	1	95	1	1	3	1	0	60	1	27	8	0	35	95	0	1	1	0	0	0	1	2.22222	6	0	0	0	1
74.6146	1	1	85	1	0	2	0	0	45	1	140	9	0	40	85	1	0	0	1	0	0	1	0.321429	8	1	0	0	0
80.3395	0	1	55	0	1	7	1	1	55	1	61	4	0	0	55	1	1	1	1	0	0	1	0.901639	5	0	0	0	0
81.4675	0	0	80	1	1	1	1	0	25	1	32	2	0	55	80	0	1	0	1	0	0	1	0.78125	8	0	0	0	0
79.7947	0	0	95	1	0	4	1	0	45	1	55	7	0	50	95	0	1	0	0	0	0	1	0.818182	6	1	0	0	0
77.4593	0	1	90	1	1	6	1	1	45	1	19	7	0	45	90	1	1	1	0	0	0	1	2.36842	8	0	1	0	0
73.8563	0	1	95	1	1	2	1	0	85	0.944444	28	9	0	10	100	0	0	0	0	0	0	1	3.03571	8	0	0	0	1
58.2094	1	1	95	0	1	5	1	0	65	0.928571	73	17	0	30	100	0	1	0	1	0	0	1	0.890411	3	0	1	0	0
65.9411	0	1	95	1	0	4	1	1	65	0.928571	115	12	0	30	100	1	1	0	1	0	0	1	0.565217	5	0	1	0	0
71.5209	1	1	95	1	0	0	1	0	65	0.928571	64	16	0	30	100	0	0	0	0	0	0	1	1.01562	7	0	1	0	1
71.6386	0	0	95	1	1	2	1	0	60	0.923077	28	1	0	35	100	1	0	0	0	0	0	0	2.14286	8	1	0	0	0
91.436	0	1	60	0	1	2	#NULL!	0	55	0.916667	65	6	0	5	65	1	0	0	0	0	0	1	0.846154	6	1	0	0	1
84.0329	0	1	95	0	1	0	1	1	55	0.916667	68	10	0	40	100	0	0	0	1	0	0	1	0.808824	5	1	0	0	0
80.8049	0	1	95	0	1	2	1	0	55	0.916667	28	3	0	40	100	0	0	0	1	0	1	0	1.96429	5	0	0	0	0
80.2574	0	1	75	1	1	3	1	0	55	0.916667	60	7	0	20	80	1	0	0	0	0	0	1	0.916667	6	1	0	0	0
76.7995	1	1	70	1	0	7	1	1	55	0.916667	62	4	0	15	75	1	1	1	0	0	0	1	0.887097	8	0	1	0	1
69.755	0	0	50	0	1	1	1	0	50	0.909091	79	5	0	0	55	0	0	0	1	0	0	1	0.632911	8	1	0	0	0
84.2382	0	0	95	0	0	1	#NULL!	1	50	0.909091	98	6	0	45	100	0	1	0	0	0	0	1	0.510204	8	1	0	0	0
75.7919	0	0	95	1	1	1	3	0	50	0.909091	50	2	0	45	100	0	0	0	1	0	0	1	1	8	0	1	0	1
68.3723	0	0	95	1	1	0	1	0	40	0.888889	30	3	0	55	100	0	1	0	0	0	0	1	1.33333	8	1	0	0	0
76.9309	0	1	85	1	1	1	1	1	80	0.888889	41	21	0	5	95	1	0	0	1	0	0	1	1.95122	3	0	1	0	1
87.447	0	0	45	0	1	2	#NULL!	#NULL!	35	0.875	67	2	#NULL!	10	50	0	0	0	1	0	#NULL!	1	0.522388	8	1	0	#NULL!	1
61.2786	#NULL!	0	95	0	0	1	1	0	35	0.875	27	2	0	60	100	0	0	0	1	0	0	1	1.2963	8	1	1	0	1
65.5305	1	0	95	1	0	1	1	0	35	0.875	40	6	0	60	100	0	0	0	0	0	0	1	0.875	8	0	1	0	0
81.514	1	0	95	1	1	1	1	0	35	0.875	34	5	0	60	100	0	1	0	1	0	0	1	1.02941	8	0	1	0	1
81.3799	0	1	95	0	1	6	0	0	35	0.875	49	11	0	60	100	1	1	1	0	1	0	0	0.714286	5	0	1	0	0
69.588	0	0	90	1	0	0	1	0	35	0.875	60	5	0	55	95	0	0	0	1	0	0	1	0.583333	8	1	1	0	1
86.5051	0	0	85	1	1	2	1	0	35	0.875	20	2	0	50	90	0	0	0	0	0	0	1	1.75	8	1	0	0	0
74.935	0	0	95	1	1	0	1	1	35	0.875	22	5	0	60	100	0	0	0	0	0	0	1	1.59091	8	1	0	0	0
78.7187	#NULL!	0	85	1	1	0	1	0	35	0.875	37	11	0	50	90	0	0	0	0	0	0	1	0.945946	7	1	0	0	1
69.9877	1	1	65	1	1	2	1	1	65	0.866667	115	8	0	0	75	0	0	0	1	0	0	1	0.565217	8	0	1	0	0
76.7091	1	0	90	1	1	3	1	0	65	0.866667	35	0	0	25	100	1	0	1	1	0	0	1	1.85714	8	0	1	0	1
98.7324	0	0	90	0	1	1	1	0	65	0.866667	18	0	0	25	100	1	0	0	1	0	0	1	3.61111	8	1	0	0	0
59.1677	#NULL!	0	95	1	1	3	1	0	30	0.857143	15	3	0	65	100	0	1	0	1	0	0	1	2	8	0	1	0	0
78.7871	0	0	90	1	0	1	1	0	55	0.846154	53	0	0	35	100	1	0	0	1	0	0	1	1.03774	8	1	0	0	0
85.4292	0	0	55	1	1	4	1	1	25	0.833333	26	5	0	30	60	1	0	1	1	0	0	1	0.961538	6	0	0	0	1
85.5332	0	0	90	1	1	2	1	0	25	0.833333	26	0	0	65	95	0	0	0	0	0	0	1	0.961538	8	0	1	0	0
81.4648	0	0	90	0	1	2	0	1	45	0.818182	31	3	0	45	100	0	0	0	1	0	0	1	1.45161	8	0	0	0	0
71.0363	1	1	95	1	0	2	1	0	20	0.8	52	7	0	75	100	0	0	0	1	0	0	1	0.384615	8	0	1	0	0
78.6995	0	1	85	0	1	3	1	0	40	0.8	60	8	0	45	95	0	0	1	1	0	0	1	0.666667	8	1	0	0	0
83.2854	0	0	95	0	1	3	1	0	20	0.8	49	1	0	75	100	0	0	0	1	0	0	1	0.408163	8	0	0	0	0
58.5736	0	1	95	1	1	1	1	1	20	0.8	69	8	0	75	100	0	1	0	1	0	0	1	0.289855	8	0	1	0	0
63.9754	0	0	90	0	1	1	1	1	40	0.8	66	6	0	50	100	0	0	0	1	0	0	1	0.606061	8	1	0	0	0
51.5291	0	0	90	1	1	0	1	0	40	0.8	12	4	0	50	100	0	0	0	0	0	0	1	3.33333	8	0	1	0	0
77.7166	#NULL!	1	80	0	0	2	0	1	40	0.8	39	7	0	40	90	0	0	0	0	0	0	1	1.02564	5	0	0	0	0
66.8227	0	0	85	1	1	0	1	0	55	0.785714	74	12	0	30	100	0	0	0	0	0	0	1	0.743243	8	0	0	0	1
66.7242	1	1	90	#NULL!	0	2	#NULL!	0	35	0.777778	94	6	0	55	100	0	0	0	1	0	0	1	0.37234	8	0	1	0	1
81.4292	0	0	90	1	0	3	1	0	35	0.777778	34	0	0	55	100	0	0	0	0	0	0	1	1.02941	8	0	1	0	1
70.7159	1	1	90	#NULL!	0	2	1	1	35	0.777778	110	3	0	55	100	1	1	0	1	0	0	1	0.318182	8	0	0	0	0
88.8706	0	1	80	1	1	2	0	1	35	0.777778	112	2	0	45	90	1	1	0	0	0	0	0	0.3125	8	0	1	0	0
79.5975	0	0	80	1	1	0	1	0	65	0.764706	22	11	0	15	100	0	0	0	0	0	0	1	2.95455	7	1	0	0	0
69.6564	1	0	70	1	1	5	1	1	65	0.764706	62	4	0	5	90	1	1	1	1	0	1	1	1.04839	8	0	1	0	0
76.6598	0	0	90	#NULL!	0	4	1	0	30	0.75	49	3	0	60	100	1	1	0	1	0	0	1	0.612245	6	0	1	0	1
79.0609	0	0	95	1	0	4	1	0	15	0.75	20	0	0	80	100	0	1	0	0	0	0	1	0.75	8	0	1	0	0
93.4182	0	1	50	1	1	6	1	1	45	0.75	60	12	0	5	65	0	1	0	1	0	1	1	0.75	5	0	1	1	0
89.4018	0	0	50	1	1	11	1	1	15	0.75	19	7	0	35	55	1	1	1	1	0	0	1	0.789474	7	0	1	0	0
73.7139	0	0	85	0	1	3	1	0	15	0.75	28	0	0	70	90	0	0	0	1	0	0	1	0.535714	8	1	1	0	0
75.2444	0	0	80	0	1	2	1	0	60	0.75	163	7	0	20	100	0	0	0	1	0	0	1	0.368098	8	1	0	0	1
43.0418	0	0	90	1	1	1	#NULL!	0	30	0.75	23	4	0	60	100	0	1	0	0	0	0	1	1.30435	6	0	0	0	1
82.2587	0	0	90	1	0	6	1	0	30	0.75	48	2	0	60	100	0	0	0	1	0	0	1	0.625	8	0	1	0	1
81.4812	0	1	90	1	1	2	1	0	30	0.75	39	4	0	60	100	0	1	1	0	0	0	1	0.769231	4	1	0	0	0
86.5079	0	0	75	1	1	3	0	1	70	0.736842	35	1	0	5	100	1	0	0	0	1	0	1	2	8	0	1	1	0
86.5681	0	0	70	0	1	6	1	0	70	0.736842	52	0	0	0	95	0	1	0	1	0	0	1	1.34615	7	1	0	0	0
95.9918	0	1	65	0	1	5	0	0	40	0.727273	32	21	0	25	80	1	1	0	1	0	0	1	1.25	4	0	0	0	1
62.423	0	1	85	0	1	2	#NULL!	0	25	0.714286	217	3	0	60	95	1	1	0	0	0	0	1	0.115207	8	1	0	0	0
79.0144	0	0	90	1	0	2	1	0	25	0.714286	41	2	0	65	100	0	0	0	0	0	0	1	0.609756	8	1	0	0	0
#NULL!	#NULL!	1	75	#NULL!	1	#NULL!	1	#NULL!	25	0.714286	40	3	#NULL!	50	85	#NULL!	#NULL!	#NULL!	#NULL!	#NULL!	#NULL!	0	0.625	#NULL!	#NULL!	#NULL!	#NULL!	#NULL!
77.796	0	1	60	1	0	2	3	0	50	0.714286	10	2	0	10	80	0	0	0	0	0	0	1	5	8	1	0	0	0
84.7748	0	1	75	1	1	2	1	0	60	0.705882	25	11	0	15	100	0	0	0	1	0	0	1	2.4	6	0	1	0	0
64.9802	1	1	85	1	1	8	#NULL!	0	35	0.7	77	8	0	50	100	0	1	0	0	0	0	1	0.454545	8	0	1	0	0
59.6057	1	0	85	1	1	3	1	0	35	0.7	63	9	0	50	100	1	0	0	0	0	0	1	0.555556	8	0	0	0	0
69.8891	1	0	30	#NULL!	0	5	0	0	20	0.666667	35	3	0	10	40	0	1	1	1	1	0	2	0.571429	7	0	1	0	1
64.3094	1	0	95	1	0	1	1	0	10	0.666667	44	0	0	85	100	0	0	0	0	0	0	1	0.227273	8	0	0	0	1
81.8809	0	0	85	1	1	0	1	0	30	0.666667	21	1	0	55	100	0	0	0	1	0	0	1	1.42857	8	0	0	0	1
73.7823	0	0	55	0	1	1	0	1	40	0.666667	57	8	0	15	75	0	0	0	1	0	1	1	0.701754	7	1	0	0	0
83.2553	0	0	70	1	1	3	1	1	20	0.666667	5	9	0	50	80	0	0	1	0	0	0	1	4	5	0	1	0	0
79.0226	0	0	50	0	0	2	1	1	50	0.666667	130	6	0	0	75	0	1	1	0	0	0	0	0.384615	5	1	0	0	1
81.1663	0	0	65	1	1	4	1	1	40	0.666667	36	9	0	25	85	1	1	0	0	0	0	1	1.11111	7	0	1	0	0
51.666	0	0	95	1	1	4	1	0	10	0.666667	49	0	0	85	100	1	1	0	0	0	0	1	0.204082	8	1	0	0	0
82.2806	0	1	70	1	1	1	1	1	55	0.647059	42	13	0	15	100	0	0	0	0	0	0	1	1.30952	6	0	1	0	1
73.6126	0	1	50	1	1	7	#NULL!	0	45	0.642857	63	11	0	5	75	1	1	0	0	0	0	1	0.714286	8	0	1	0	0
69.6975	0	0	80	1	0	4	1	0	35	0.636364	121	6	0	45	100	0	1	0	0	0	0	1	0.289256	8	0	1	0	0
74.3299	1	1	50	0	0	5	0	1	35	0.636364	82	8	0	15	70	1	0	0	1	0	0	1	0.426829	7	0	1	1	0
68.668	0	0	80	1	1	3	1	0	35	0.636364	41	3	0	45	100	0	0	0	1	0	0	1	0.853659	8	0	1	0	0
48.8789	0	1	50	1	1	7	0	0	50	0.625	58	16	0	0	80	1	0	0	0	0	0	1	0.862069	6	0	1	0	1
71.3922	0	0	70	0	1	1	0	1	25	0.625	108	4	0	45	85	0	0	0	1	0	0	1	0.231481	8	1	0	0	0
66.6393	0	0	85	1	0	2	1	0	25	0.625	60	2	0	60	100	0	0	0	1	0	0	1	0.416667	8	0	1	0	0
56.8597	1	1	70	1	1	2	1	1	50	0.625	199	20	1	20	100	0	0	0	1	0	0	1	0.251256	7	0	1	0	0
57.5441	1	0	75	1	1	0	1	0	40	0.615385	36	5	0	35	100	0	1	0	1	0	0	1	1.11111	8	0	1	0	0
76.3094	0	1	65	0	0	3	1	1	40	0.615385	78	12	0	25	90	1	0	0	0	0	0	1	0.512821	8	0	0	0	0
62.5407	1	1	45	0	0	5	0	1	45	0.6	50	16	0	0	75	1	1	0	1	0	0	1	0.9	4	0	1	1	0
60.1725	0	0	90	1	0	3	1	0	15	0.6	36	9	0	75	100	0	0	0	1	0	0	1	0.416667	8	0	1	0	0
70.2834	0	1	60	0	1	2	1	1	30	0.6	63	9	0	30	80	0	1	1	1	0	0	1	0.47619	6	1	0	0	0
81.6318	0	0	80	1	1	3	1	0	30	0.6	58	5	0	50	100	0	0	0	0	0	0	1	0.517241	8	0	0	0	0
83.7317	0	1	60	0	1	4	1	1	60	0.6	72	13	0	0	100	0	0	0	1	0	0	1	0.833333	8	0	1	0	0
70.8282	0	1	65	0	1	4	0	1	50	0.588235	69	9	0	15	100	1	1	0	1	0	0	1	0.724638	8	1	0	0	0
77.0979	0	0	55	0	1	4	1	0	50	0.588235	28	2	0	5	90	1	0	0	0	0	0	1	1.78571	8	1	0	0	0
55.718	0	0	75	1	1	3	1	1	35	0.583333	57	18	0	40	100	1	0	0	1	0	0	1	0.614035	8	0	1	0	0
83.7262	0	1	60	1	1	0	1	1	55	0.578947	59	10	0	5	100	0	0	0	0	0	0	1	0.932203	7	0	1	0	1
82.5407	0	1	40	0	0	6	0	1	40	0.571429	52	5	0	0	70	0	1	0	1	0	0	1	0.769231	8	0	1	0	0
80.3559	0	0	85	0	0	5	1	0	20	0.571429	108	6	0	65	100	0	1	0	0	0	0	1	0.185185	8	0	1	0	1
80.4134	0	1	70	0	1	1	1	1	40	0.571429	50	5	0	30	100	0	1	0	0	0	0	1	0.8	8	0	1	0	0
74.5873	0	0	85	0	1	4	1	0	20	0.571429	18	0	0	65	100	0	1	0	0	0	0	1	1.11111	8	0	1	0	0
87.2005	0	0	50	0	0	2	0	1	45	0.5625	54	9	0	5	85	0	0	0	0	0	0	1	0.833333	8	0	0	0	1
93.9959	0	1	30	0	1	5	1	1	25	0.555556	45	10	0	5	50	0	0	1	0	0	0	1	0.555556	6	1	0	1	0
69.3498	0	0	60	1	0	3	1	0	50	0.555556	111	11	0	10	100	0	0	0	1	0	0	1	0.45045	8	1	0	0	1
84.9802	1	1	80	1	0	2	1	0	25	0.555556	47	12	0	55	100	0	1	1	0	0	0	1	0.531915	4	1	#NULL!	0	0
63.8877	0	1	55	0	1	3	0	1	55	0.55	160	19	0	0	100	0	0	0	0	0	0	1	0.34375	3	0	0	1	0
79.6715	0	0	55	0	1	6	1	0	30	0.545455	90	2	0	25	80	0	1	0	1	0	0	1	0.333333	8	0	1	0	1
70.423	1	1	75	1	0	1	1	0	30	0.545455	57	1	0	45	100	0	0	0	1	0	0	1	0.526316	7	0	1	0	0
62.1164	0	0	70	1	1	1	1	1	30	0.545455	63	1	0	40	95	0	1	0	0	0	0	1	0.47619	7	1	0	0	0
55.9343	0	0	45	0	0	5	1	1	35	0.538462	91	14	0	10	75	1	1	0	0	0	0	1	0.384615	8	1	0	0	1
66.9788	0	1	70	1	1	3	1	0	35	0.538462	90	16	0	35	100	0	1	0	1	0	0	1	0.388889	8	0	0	0	0
80.3888	0	0	40	1	1	0	1	1	40	0.533333	96	16	0	0	75	0	0	0	0	0	0	1	0.416667	5	1	1	1	0
79.8987	1	1	50	1	1	3	#NULL!	1	45	0.529412	101	15	0	5	90	1	0	0	0	0	0	1	0.445545	6	0	1	0	0
82.8227	1	1	50	1	1	4	0	1	50	0.526316	127	21	0	0	95	0	0	0	0	0	0	1	0.393701	3	0	1	1	0
75.6112	1	1	60	1	1	3	1	0	40	0.5	78	15	0	20	100	0	0	0	0	0	0	1	0.512821	7	1	1	0	0
74.8118	0	0	45	1	0	2	1	1	20	0.5	57	4	0	25	65	0	0	0	0	0	0	1	0.350877	5	0	1	0	0
76.1971	0	0	55	1	1	3	1	0	40	0.5	170	10	0	15	95	0	0	0	0	0	1	1	0.235294	4	1	0	0	0
70.6201	1	1	50	0	0	2	0	1	50	0.5	47	17	0	0	100	0	1	0	1	0	1	1	1.06383	7	0	1	1	0
74.0178	1	1	95	0	0	2	0	1	5	0.5	39	7	0	90	100	1	0	0	0	0	0	1	0.128205	8	0	1	0	0
72.4025	1	1	75	0	1	0	1	1	25	0.5	46	11	0	50	100	0	0	0	1	0	1	1	0.543478	5	0	1	0	0
74.6092	0	0	70	1	1	2	1	1	30	0.5	58	14	0	40	100	1	1	0	0	0	0	1	0.517241	8	0	0	0	0
83.102	0	0	50	1	1	1	1	0	45	0.5	62	0	0	5	95	0	0	0	0	0	0	1	0.725806	7	0	1	0	0
100.348	0	1	60	1	1	4	1	1	40	0.5	84	8	0	20	100	0	0	1	1	0	0	1	0.47619	7	0	1	0	0
77.8919	0	0	65	1	1	3	1	1	35	0.5	40	13	0	30	100	0	1	0	1	0	0	1	0.875	8	1	1	0	0
69.1307	1	1	65	1	0	3	0	0	35	0.5	113	14	0	30	100	0	0	0	0	0	0	1	0.309735	4	0	1	0	0
76.553	0	0	60	1	1	2	0	0	40	0.5	80	8	0	20	100	0	1	0	1	0	0	1	0.5	6	0	1	0	1
78.4038	0	1	50	0	0	2	0	1	35	0.5	76	9	0	15	85	0	1	0	1	0	1	1	0.460526	7	0	1	0	0
69.2211	0	1	70	1	1	4	1	1	30	0.5	87	13	0	40	100	0	0	0	1	0	0	1	0.344828	4	0	1	1	0
80.5257	0	0	85	1	0	0	1	0	15	0.5	87	3	0	70	100	0	0	0	0	0	0	1	0.172414	8	0	0	0	0
73.9877	1	1	50	1	1	0	1	1	45	0.473684	102	11	0	5	100	0	0	0	1	0	0	1	0.441176	6	0	1	0	0
66.4422	1	1	55	#NULL!	0	2	1	0	40	0.470588	124	21	0	15	100	0	0	0	0	0	0	1	0.322581	3	0	1	0	0
69.1116	0	0	60	1	1	4	1	0	35	0.466667	84	15	0	25	100	0	1	0	1	0	0	1	0.416667	7	0	1	0	0
72.3504	1	0	65	1	0	0	1	0	30	0.461538	112	10	0	35	100	0	0	0	1	0	0	1	0.267857	8	1	0	0	0
70.2396	0	0	65	1	1	4	1	0	25	0.454545	141	7	0	40	95	1	1	0	0	0	0	1	0.177305	8	1	1	0	0
78.3436	0	0	55	1	1	0	0	0	20	0.444444	37	10	0	35	80	0	0	0	0	0	0	1	0.540541	8	1	0	0	0
58.193	1	1	75	1	0	2	1	0	20	0.444444	21	7	0	55	100	0	0	0	1	0	0	1	0.952381	8	0	1	0	0
87.1211	0	1	15	0	1	2	1	1	15	0.428571	102	14	0	0	35	1	0	0	1	0	0	1	0.147059	5	1	0	0	0
78.5626	0	1	35	0	1	3	0	1	30	0.428571	120	12	0	5	75	1	1	1	1	0	0	1	0.25	5	1	0	0	0
67.2115	1	1	60	1	1	0	1	0	30	0.428571	57	13	0	30	100	0	0	0	1	0	0	1	0.526316	8	0	1	0	0
64.7639	0	0	80	1	0	2	1	1	15	0.428571	62	12	0	65	100	0	0	0	0	0	0	1	0.241935	7	1	1	0	0
85.7933	0	0	80	1	1	0	1	1	15	0.428571	32	0	0	65	100	0	0	0	0	0	0	1	0.46875	8	0	1	0	1
83.0746	0	1	45	1	1	3	1	0	40	0.421053	141	13	0	5	100	0	0	0	1	0	0	1	0.283688	6	1	0	0	0
84.9062	0	1	35	1	1	3	0	0	25	0.416667	89	5	0	10	70	1	0	0	0	0	0	1	0.280899	8	1	0	0	0
75.5866	0	0	30	0	1	5	0	1	25	0.416667	62	12	0	5	65	1	1	0	1	0	0	1	0.403226	7	0	1	0	0
78.653	0	0	25	0	0	5	1	1	25	0.416667	150	9	0	0	60	0	1	1	1	0	0	1	0.166667	5	0	0	0	1
67.499	0	1	65	1	1	0	1	1	25	0.416667	33	14	0	40	100	0	0	0	1	0	0	1	0.757576	5	0	1	0	1
70.9076	1	0	65	0	0	3	0	0	25	0.416667	38	6	0	40	100	0	0	0	1	0	0	3	0.657895	8	0	1	0	0
83.7563	0	0	55	0	1	2	0	1	25	0.416667	64	4	1	30	90	0	1	0	1	0	1	1	0.390625	7	1	0	0	0
97.6208	0	0	40	0	1	1	0	0	35	0.411765	28	3	0	5	90	1	0	0	0	1	0	1	1.25	8	0	1	0	0
89.1307	0	#NULL!	10	0	1	4	1	1	10	0.4	46	22	0	0	25	1	0	0	0	0	0	1	0.217391	3	1	0	0	0
80.3943	0	0	40	0	1	2	1	0	20	0.4	38	6	0	20	70	0	1	1	1	0	0	1	0.526316	6	1	0	0	0
67.447	0	0	85	1	1	1	1	1	10	0.4	28	1	0	75	100	0	1	0	0	0	0	1	0.357143	7	1	0	0	0
81.2512	0	0	70	1	1	5	1	1	10	0.4	24	6	0	60	85	1	0	0	0	0	0	1	0.416667	8	1	0	0	0
83.2307	0	#NULL!	40	1	1	1	1	#NULL!	40	0.4	66	6	0	0	100	0	0	0	1	0	0	1	0.606061	3	0	0	0	0
84.2163	0	1	35	0	1	2	1	1	35	0.388889	32	19	0	0	90	1	0	0	0	0	0	0	1.09375	5	1	0	0	0
55.1704	1	1	50	1	0	4	3	0	25	0.384615	68	12	0	25	90	0	1	0	1	0	0	1	0.367647	8	0	1	0	0
76.8433	0	1	60	1	1	1	0	1	25	0.384615	62	10	0	35	100	1	0	0	0	0	0	1	0.403226	8	1	0	0	0
67.3128	0	0	50	1	0	1	1	0	30	0.375	91	9	0	20	100	0	0	0	0	0	0	1	0.32967	8	1	1	0	0
69.5688	0	1	50	0	1	4	1	1	30	0.375	103	12	0	20	100	1	0	0	0	0	0	1	0.291262	8	1	0	0	1
70.0479	0	0	75	0	0	2	1	1	15	0.375	38	3	0	60	100	0	1	0	1	0	0	1	0.394737	8	1	0	0	0
69.6728	0	0	40	1	1	2	1	0	35	0.368421	49	10	0	5	100	0	0	0	0	0	0	1	0.714286	8	0	1	0	0
88.4572	0	0	65	0	1	2	1	0	20	0.363636	48	5	0	45	100	0	0	0	0	0	0	1	0.416667	6	1	0	0	0
73.3306	#NULL!	0	55	0	0	4	1	0	25	0.357143	153	6	0	30	100	0	1	0	1	0	0	1	0.163399	6	0	1	0	0
75.2526	0	1	35	1	0	3	0	0	35	0.35	42	12	0	0	100	0	1	0	1	0	0	0	0.833333	4	0	1	1	0
72.7392	0	1	35	1	1	3	0	0	35	0.35	85	22	0	0	100	1	0	0	1	0	0	1	0.411765	7	1	0	0	0
84.1314	0	1	5	0	1	2	0	1	5	0.333333	59	22	0	0	15	1	1	0	0	0	0	1	0.0847458	4	0	1	0	0
91.1376	0	1	10	1	1	2	1	1	10	0.333333	29	24	0	0	30	0	1	1	0	0	0	1	0.344828	5	1	0	0	0
86.5626	0	1	35	0	1	7	1	1	25	0.333333	44	4	0	10	85	0	1	0	1	0	0	1	0.568182	8	0	0	0	0
88.1889	0	1	45	0	1	3	#NULL!	0	25	0.333333	142	4	0	20	95	0	0	1	0	0	0	1	0.176056	8	0	0	0	1
52.4025	1	1	70	1	0	2	1	1	15	0.333333	69	6	0	55	100	0	0	0	0	0	0	1	0.217391	8	0	1	1	0
78.5435	0	1	70	0	0	2	1	0	10	0.333333	6	8	0	60	90	1	1	0	1	0	0	1	1.66667	8	1	0	0	0
86.4887	0	0	65	0	0	2	0	0	15	0.333333	84	9	0	50	95	0	0	1	0	0	0	3	0.178571	5	1	0	0	0
78.5106	1	1	50	1	0	5	1	0	25	0.333333	89	17	0	25	100	0	0	1	0	0	0	1	0.280899	4	0	1	0	0
85.9713	0	1	50	0	0	3	1	0	20	0.333333	42	16	0	30	90	0	0	0	0	0	0	1	0.47619	3	1	0	0	0
89.1335	0	1	35	0	1	2	1	1	30	0.315789	68	26	0	5	100	0	0	0	0	0	0	1	0.441176	4	0	1	0	0
74.3792	0	1	35	1	1	2	1	1	30	0.315789	93	16	0	5	100	0	0	0	0	0	0	1	0.322581	8	1	0	0	0
67.2307	1	1	35	#NULL!	1	4	#NULL!	0	30	0.315789	130	21	0	5	100	0	0	0	0	0	0	1	0.230769	5	0	0	0	0
67.0034	#NULL!	1	35	1	0	6	0	1	30	0.315789	61	18	0	5	100	1	0	1	1	0	0	1	0.491803	4	0	1	0	0
69.5414	0	0	45	1	1	0	1	1	25	0.3125	72	18	0	20	100	0	0	0	0	0	0	1	0.347222	8	1	0	0	0
65.3771	1	1	55	1	1	3	0	0	20	0.307692	120	14	0	35	100	0	0	0	0	0	0	1	0.166667	6	0	1	0	0
76.8843	0	1	60	0	0	1	1	0	15	0.3	37	10	0	45	95	0	0	0	0	0	0	1	0.405405	8	1	0	0	0
88.0082	#NULL!	0	40	#NULL!	0	2	0	1	25	0.294118	108	6	0	15	100	0	0	0	1	0	1	1	0.231481	6	0	1	0	0
84.6215	0	0	35	0	1	2	0	1	25	0.294118	98	12	0	10	95	0	1	0	1	0	0	1	0.255102	6	0	1	0	0
100.022	0	1	30	0	1	0	1	0	20	0.285714	60	14	0	10	80	0	0	0	1	0	0	1	0.333333	6	1	0	0	1
73.9822	0	1	50	0	1	2	0	1	20	0.285714	27	11	0	30	100	0	1	0	1	0	0	1	0.740741	7	1	1	0	0
86.4093	0	#NULL!	35	0	1	4	0	1	25	0.277778	28	26	0	10	100	1	0	1	0	0	0	1	0.892857	5	0	1	0	1
79.5756	1	1	55	#NULL!	0	4	#NULL!	1	15	0.272727	71	8	0	40	95	1	0	1	0	0	0	1	0.211268	6	0	1	0	0
90.5325	0	0	20	0	1	6	0	0	20	0.266667	90	8	0	0	75	1	0	0	0	0	0	1	0.222222	6	1	0	0	0
91.9863	0	1	45	1	1	2	1	0	20	0.266667	109	5	0	25	100	0	0	0	0	0	0	1	0.183486	6	0	0	0	0
68.8816	0	0	30	1	1	1	0	0	25	0.263158	62	12	0	5	100	0	0	0	0	0	0	1	0.403226	8	1	0	0	0
80.1725	0	1	30	1	0	0	0	1	25	0.263158	171	22	0	5	100	0	0	0	1	0	0	1	0.146199	4	1	0	0	0
67.9233	#NULL!	0	55	1	1	1	1	1	15	0.25	105	16	0	40	100	0	0	0	0	0	0	2	0.142857	6	0	1	0	0
70.82	0	0	25	1	0	6	0	1	20	0.25	112	8	0	5	85	0	1	0	0	0	0	1	0.178571	4	0	0	0	0
54.4367	0	1	70	#NULL!	0	4	#NULL!	0	10	0.25	201	7	0	60	100	1	1	0	0	0	0	1	0.0497512	8	1	0	0	0
63.885	0	1	70	0	0	2	1	1	10	0.25	45	4	0	60	100	0	1	0	0	0	0	1	0.222222	7	0	1	0	0
84.3532	0	1	50	1	1	0	3	1	15	0.25	60	4	0	35	95	0	0	0	0	0	0	1	0.25	5	1	0	0	0
68.3723	0	0	50	0	0	1	1	0	15	0.230769	58	6	0	35	100	1	0	0	1	0	0	1	0.258621	8	1	1	0	0
86.2916	0	0	30	0	1	1	1	1	20	0.222222	26	4	0	10	100	0	0	0	0	0	0	1	0.769231	8	1	1	0	0
90.883	0	0	45	1	1	3	1	1	15	0.214286	72	2	0	30	100	1	0	0	0	0	1	1	0.208333	8	0	1	0	0
61.1882	0	0	25	0	1	2	#NULL!	0	20	0.210526	126	14	0	5	100	0	0	0	0	0	0	1	0.15873	8	0	0	0	1
#NULL!	#NULL!	0	25	#NULL!	1	#NULL!	0	#NULL!	20	0.210526	64	20	#NULL!	5	100	#NULL!	#NULL!	#NULL!	#NULL!	#NULL!	#NULL!	0	0.3125	#NULL!	#NULL!	#NULL!	#NULL!	#NULL!
80.1999	0	1	20	1	1	4	1	1	20	0.210526	213	27	0	0	95	0	0	0	1	0	0	1	0.0938967	3	0	1	1	0
73.4264	0	0	25	1	0	5	3	0	20	0.210526	87	3	0	5	100	0	0	0	0	0	0	1	0.229885	8	1	1	0	1
82.4531	0	1	5	0	1	6	0	1	5	0.2	67	20	0	0	25	0	0	0	0	0	0	1	0.0746269	7	1	0	0	0
89.2895	0	0	40	0	1	4	1	0	5	0.2	56	5	0	35	60	1	0	0	1	0	0	1	0.0892857	6	0	0	0	0
74.4942	1	0	35	1	0	6	0	0	15	0.2	87	10	0	20	95	0	0	#NULL!	0	0	0	1	0.172414	4	0	1	0	0
65.9603	0	0	80	1	1	1	0	1	5	0.2	79	1	0	75	100	0	1	0	1	0	1	1	0.0632911	8	0	0	0	0
66.5927	0	1	80	0	0	1	1	1	5	0.2	75	9	0	75	100	1	0	0	1	0	0	1	0.0666667	5	1	0	0	0
90.6037	0	1	40	0	1	2	0	0	15	0.2	287	6	0	25	100	0	0	0	0	0	0	1	0.0522648	8	1	0	0	1
84.4408	0	0	60	1	1	1	0	1	10	0.2	54	2	0	50	100	0	0	1	1	0	0	1	0.185185	8	0	0	0	1
79.77	0	1	55	1	1	1	1	1	10	0.181818	16	13	0	45	100	0	0	0	1	0	0	1	0.625	5	1	0	0	1
86.9432	0	0	30	1	1	3	#NULL!	1	15	0.176471	107	9	0	15	100	1	0	0	0	0	0	1	0.140187	8	1	1	0	0
61.7522	0	0	30	1	1	6	1	0	15	0.176471	62	7	0	15	100	1	0	0	1	0	0	1	0.241935	8	0	0	0	0
83.0308	0	0	25	0	1	2	1	0	15	0.166667	147	11	0	10	100	0	0	0	1	0	0	1	0.102041	6	1	0	0	0
86.7461	0	0	50	0	1	9	1	1	10	0.166667	64	4	0	40	100	1	0	1	0	0	0	1	0.15625	3	0	1	0	0
75.1157	0	1	20	1	1	1	0	1	15	0.157895	15	23	0	5	100	0	0	0	0	0	0	1	1	5	0	0	0	0
80.5832	0	1	20	0	0	4	0	1	15	0.157895	80	16	0	5	100	1	0	0	0	0	0	1	0.1875	8	1	0	0	0
75.781	0	1	10	0	0	9	1	1	10	0.153846	124	12	0	0	65	0	1	1	0	0	0	1	0.0806452	6	1	0	1	0
81.1691	0	1	45	1	1	5	0	0	10	0.153846	72	4	0	35	100	1	0	0	0	0	0	1	0.138889	8	1	0	0	0
74.4312	0	0	15	1	1	0	0	0	15	0.15	36	14	0	0	100	0	0	0	0	0	0	1	0.416667	7	0	1	0	0
81.4675	0	0	5	1	1	3	1	0	5	0.142857	74	10	0	0	35	0	0	0	0	0	0	1	0.0675676	8	1	0	0	1
85.6865	0	0	15	0	0	1	#NULL!	1	10	0.142857	68	10	0	5	75	1	0	0	1	0	0	1	0.147059	8	1	0	0	0
83.0554	0	0	20	1	1	5	0	0	5	0.142857	51	2	0	15	50	0	1	0	1	1	0	1	0.0980392	6	0	0	0	0
71.2745	0	0	40	0	0	3	0	0	5	0.142857	31	8	0	35	70	0	1	0	1	0	0	1	0.16129	8	0	1	0	0
74.3244	0	0	35	1	1	3	1	0	10	0.133333	62	12	0	25	100	0	1	0	0	0	1	1	0.16129	6	0	0	0	0
91.1786	0	0	10	0	1	2	1	0	5	0.125	58	4	0	5	45	1	1	0	0	0	0	1	0.0862069	8	1	0	0	0
90.8638	0	1	20	#NULL!	1	3	0	1	10	0.125	28	11	0	10	90	1	0	0	1	0	0	1	0.357143	6	1	0	0	0
73.9822	0	0	60	0	0	4	1	1	5	0.125	58	2	0	55	95	1	0	0	1	0	0	1	0.0862069	8	1	0	0	0
73.9466	0	0	65	0	1	2	0	1	5	0.125	51	2	0	60	100	0	1	0	0	0	0	1	0.0980392	6	1	0	0	0
75.3977	0	0	25	1	1	2	0	0	10	0.117647	32	12	0	15	100	1	0	0	0	0	0	1	0.3125	5	1	0	0	0
79.1129	0	0	25	1	0	2	0	1	10	0.117647	171	3	0	15	100	0	1	0	1	0	0	1	0.0584795	6	1	0	0	1
80.4682	0	#NULL!	10	1	1	1	0	#NULL!	10	0.111111	115	22	0	0	90	0	0	1	1	0	0	1	0.0869565	3	1	0	0	1
58.7652	1	1	10	1	1	8	#NULL!	1	5	0.111111	79	23	0	5	50	1	1	0	1	0	0	0	0.0632911	6	0	1	0	0
67.7016	0	0	60	0	0	2	0	1	5	0.111111	20	0	0	55	100	1	1	0	0	0	0	1	0.25	8	0	0	0	1
83.718	0	1	10	0	1	4	1	1	10	0.105263	132	16	0	0	95	1	0	0	1	0	0	0	0.0757576	3	0	0	1	0
78.9596	0	1	15	1	1	1	0	0	10	0.105263	11	21	0	5	100	0	1	0	1	0	1	1	0.909091	8	0	1	0	0
82.9925	0	1	10	0	1	4	0	1	10	0.1	50	22	0	0	100	1	0	0	1	0	0	1	0.2	5	1	0	1	0
69.1143	0	1	10	1	0	3	#NULL!	1	10	0.1	201	21	0	0	100	0	0	0	1	0	0	0	0.0497512	3	0	1	1	0
75.4853	0	1	10	0	1	0	0	1	10	0.1	135	21	0	0	100	0	0	0	0	0	1	1	0.0740741	3	1	0	0	0
87.5811	1	1	10	0	1	0	0	1	10	0.1	60	29	0	0	100	0	0	0	1	0	0	1	0.166667	3	0	1	1	0
75.0089	0	1	10	0	1	5	0	1	5	0.0909091	92	20	0	5	60	0	0	0	0	0	1	1	0.0543478	4	1	0	0	0
79.7864	0	0	45	0	1	1	1	1	5	0.0909091	30	1	0	40	95	1	0	0	0	0	0	1	0.166667	8	0	0	0	0
85.5387	0	1	10	0	1	3	0	1	5	0.0833333	78	16	0	5	65	0	1	1	0	0	1	1	0.0641026	5	1	0	0	0
83.3429	0	0	5	1	1	4	1	0	5	0.0833333	78	6	0	0	60	0	0	1	0	0	1	1	0.0641026	5	1	0	0	1
93.8864	0	1	30	0	1	3	1	0	5	0.0769231	108	13	0	25	90	1	0	1	0	0	0	1	0.0462963	8	1	0	0	0
87.4497	0	0	10	0	0	0	0	1	5	0.0666667	63	17	0	5	80	0	0	0	0	0	0	1	0.0793651	8	1	0	0	0
87.2854	0	0	25	0	1	2	1	0	5	0.0666667	61	6	0	20	95	1	1	0	0	0	0	1	0.0819672	5	1	0	0	0
64.5394	0	1	5	1	1	0	0	1	5	0.0625	131	24	0	0	80	0	0	0	0	0	0	1	0.0381679	5	1	0	1	0
78.8063	0	1	5	0	1	5	#NULL!	1	5	0.0555556	137	16	0	0	90	1	0	0	0	0	1	1	0.0364964	3	1	0	1	0
85.306	0	0	15	1	1	2	1	1	5	0.0555556	43	11	0	10	100	0	0	0	1	0	0	1	0.116279	7	1	0	0	0
59.2197	1	1	5	1	1	3	#NULL!	1	5	0.0555556	71	23	0	0	90	1	0	0	1	0	1	1	0.0704225	3	0	1	0	0
87.9617	0	1	5	0	1	4	1	0	5	0.0526316	63	19	0	0	95	1	0	0	0	0	1	1	0.0793651	6	1	0	0	0
39.5017	1	1	10	1	1	4	0	0	5	0.0526316	20	15	0	5	100	1	1	0	0	0	0	1	0.25	8	0	1	0	0
76.2875	0	1	10	0	1	6	3	1	5	0.0526316	47	23	0	5	100	0	1	0	1	0	0	1	0.106383	5	0	1	1	0
82.1328	1	1	5	0	1	2	0	0	5	0.05	43	20	0	0	100	0	0	0	1	0	0	1	0.116279	5	0	0	1	0
75.896	1	1	5	1	1	4	0	1	5	0.05	195	18	0	0	100	0	1	0	0	0	0	1	0.025641	5	0	1	0	0
66.9268	1	1	5	0	1	2	0	0	5	0.05	183	10	0	0	100	0	0	0	0	0	0	0	0.0273224	3	0	1	0	0
68.0986	0	1	#NULL!	0	1	3	2	1	0	#NULL!	14	23	0	0	65	0	1	1	1	0	1	1	0	5	1	0	1	0
79.7728	0	1	#NULL!	0	1	7	2	1	0	#NULL!	8	24	0	0	55	1	1	1	1	0	1	1	0	4	0	1	1	0
86.1903	0	1	#NULL!	1	1	4	2	0	0	#NULL!	#NULL!	25	0	0	75	0	0	0	0	0	1	1	0	6	0	1	0	0
87.6194	0	1	5	0	1	4	1	1	0	0	73	24	0	5	50	1	1	0	0	0	0	1	0	6	1	0	0	0
79.4579	0	1	0	0	1	4	1	1	0	0	79	35	0	0	80	0	1	1	0	0	0	1	0	3	1	0	0	0
76.3203	0	0	0	#NULL!	0	10	1	1	0	0	20	15	0	0	55	0	1	1	1	0	0	1	0	6	1	0	0	0
70.4422	0	1	5	1	1	4	1	0	0	0	165	11	0	5	100	0	1	0	0	0	0	1	0	6	1	0	0	0
78.026	1	1	#NULL!	1	1	6	2	1	0	#NULL!	68	24	0	0	35	0	0	1	0	0	1	1	0	3	0	1	1	0
85.5003	0	1	#NULL!	0	1	2	2	1	0	#NULL!	27	34	0	0	90	0	0	0	0	0	0	1	0	3	1	0	1	0
83.1075	0	1	#NULL!	0	1	3	2	1	0	#NULL!	#NULL!	31	0	0	20	1	1	1	0	0	1	1	0	3	1	0	1	1
71.4552	0	1	#NULL!	1	1	1	2	1	0	#NULL!	12	35	1	0	100	0	0	0	1	0	0	1	0	2	1	0	0	0
79.7892	0	1	#NULL!	0	1	7	2	1	0	#NULL!	275	24	0	0	85	1	1	0	1	0	0	2	0	4	1	0	0	0
75.3457	0	0	#NULL!	0	1	12	2	1	0	#NULL!	15	18	0	0	90	1	1	0	1	0	1	1	0	4	1	0	0	0
84.4627	0	1	#NULL!	1	1	1	2	1	0	#NULL!	17	22	0	0	75	0	0	0	0	0	0	1	0	5	1	0	0	0
73.4839	0	1	#NULL!	0	1	7	2	1	0	#NULL!	29	26	0	0	85	0	0	1	1	0	0	0	0	3	1	0	0	0
89.5715	0	1	#NULL!	0	1	4	2	1	0	#NULL!	55	17	0	0	80	0	1	0	0	0	0	1	0	4	1	0	0	0
69.4867	0	0	#NULL!	0	1	2	2	1	0	#NULL!	13	24	0	0	65	0	0	0	0	0	0	1	0	5	1	0	0	0
71.0034	0	1	#NULL!	0	1	5	2	1	0	#NULL!	10	29	0	0	80	1	0	0	1	0	0	1	0	3	0	1	0	0
70.9131	0	1	#NULL!	1	1	4	2	1	0	#NULL!	22	27	0	0	95	1	1	0	1	0	1	1	0	3	1	0	1	0
89.3936	0	#NULL!	#NULL!	0	1	0	2	1	0	#NULL!	100	23	0	0	95	0	0	0	0	0	0	1	0	3	1	0	1	0
96.1342	0	1	#NULL!	0	1	4	2	1	0	#NULL!	6	33	0	0	15	0	0	1	1	0	0	1	0	4	1	0	1	0
86.5544	0	0	#NULL!	0	1	8	2	0	0	#NULL!	91	4	0	0	90	0	1	0	0	0	0	1	0	8	0	0	0	0
83.7262	0	1	#NULL!	0	1	7	2	1	0	#NULL!	16	20	0	0	100	1	0	0	0	0	0	1	0	6	0	0	1	0
68.95	0	1	#NULL!	0	1	9	2	1	0	#NULL!	18	25	0	0	80	1	0	1	0	0	0	1	0	3	0	1	0	0
76.9665	0	#NULL!	#NULL!	0	1	0	2	0	0	#NULL!	7	7	0	0	80	0	0	0	1	0	0	0	0	1	0	0	0	0
84.4901	0	1	#NULL!	0	1	3	2	1	0	#NULL!	10	27	0	0	45	0	1	1	1	0	1	1	0	5	1	0	1	0
75.3812	1	#NULL!	#NULL!	0	1	3	2	1	0	#NULL!	64	11	0	0	10	1	1	1	0	1	0	1	0	6	0	1	0	0
90.3765	1	1	#NULL!	0	1	5	2	1	0	#NULL!	16	22	0	0	5	1	1	1	0	0	0	1	0	2	0	1	0	0
88.5394	0	1	#NULL!	1	1	6	2	1	0	#NULL!	3	15	0	0	35	1	0	0	0	0	1	1	0	6	1	0	1	0
85.7522	0	1	#NULL!	0	1	0	2	0	0	#NULL!	68	25	0	0	95	0	0	0	0	0	0	1	0	2	1	0	0	1
81.2731	0	#NULL!	#NULL!	0	1	2	2	0	0	#NULL!	4	7	0	0	100	1	1	0	0	0	0	1	0	1	0	0	0	1
86.4641	0	#NULL!	#NULL!	1	1	6	2	1	0	#NULL!	15	23	0	0	95	1	0	0	0	0	1	0	0	1	1	0	1	0
92.6379	0	#NULL!	#NULL!	0	1	8	2	1	0	#NULL!	5	6	0	0	75	1	1	0	1	0	0	1	0	3	1	0	0	0
98.4312	0	1	#NULL!	0	1	3	2	0	0	#NULL!	22	31	0	0	5	0	0	1	0	0	0	1	0	3	1	0	0	0
55.4196	0	#NULL!	#NULL!	0	1	2	2	1	0	#NULL!	36	10	0	0	100	0	0	0	0	0	1	1	0	2	0	0	1	1
89.1088	0	1	#NULL!	0	1	2	2	1	0	#NULL!	3	32	0	0	50	0	0	0	1	0	1	1	0	2	1	0	1	0
79.3018	0	#NULL!	#NULL!	0	1	9	2	1	0	#NULL!	7	9	0	0	20	1	1	0	0	1	0	1	0	3	1	0	0	0
76.9719	0	#NULL!	#NULL!	0	1	6	2	1	0	#NULL!	12	23	0	0	10	1	1	0	1	0	0	1	0	1	1	0	0	0
79.3703	0	1	#NULL!	1	1	3	2	1	0	#NULL!	3	15	0	0	100	0	0	0	0	0	0	1	0	3	0	0	1	0
85.7823	0	#NULL!	#NULL!	1	1	3	2	1	0	#NULL!	6	6	0	0	100	1	0	0	0	0	0	1	0	3	0	0	0	1
72.4791	0	1	#NULL!	0	1	4	2	1	0	#NULL!	4	26	0	0	100	1	1	0	1	0	1	1	0	3	1	0	0	0
79.0609	0	1	#NULL!	0	1	8	2	1	0	#NULL!	4	28	0	0	100	0	1	0	0	0	0	1	0	3	0	1	1	0
93.4073	#NULL!	0	0	0	1	1	3	1	0	0	25	23	0	0	70	0	0	0	1	0	0	1	0	5	1	0	0	0
70.5188	0	1	0	0	1	4	0	1	0	0	149	25	0	0	100	1	1	0	0	0	0	1	0	3	1	0	1	0
75.7481	0	#NULL!	0	0	1	4	0	1	0	0	68	21	0	0	95	0	1	0	0	0	1	1	0	5	1	0	0	0
85.2786	0	1	0	0	1	4	0	1	0	0	56	24	0	0	90	0	1	0	1	0	1	1	0	3	1	0	1	0
79.6496	#NULL!	1	0	0	0	2	0	1	0	0	72	32	0	0	100	0	1	0	1	0	1	1	0	2	0	#NULL!	1	0
81.8289	0	#NULL!	0	1	0	4	0	1	0	0	75	17	0	0	95	0	0	1	0	0	1	1	0	2	1	0	1	0
86.6995	0	1	0	1	1	1	0	1	0	0	62	15	0	0	85	0	1	0	0	1	0	1	0	6	1	0	0	0
94.5079	0	1	0	1	1	2	0	1	0	0	20	22	0	0	95	0	0	0	0	0	0	1	0	6	1	0	0	1
92.4025	0	1	0	0	1	4	0	1	0	0	49	15	0	0	70	1	0	1	0	0	0	1	0	6	0	1	0	1
92.4736	0	1	0	0	1	5	0	1	0	0	35	24	0	0	15	1	1	1	1	1	1	1	0	3	1	0	0	0
75.6386	0	0	15	0	0	3	0	1	0	0	16	8	0	15	55	1	1	0	1	1	0	1	0	6	1	0	1	0
82.527	0	1	30	0	1	2	1	1	0	0	103	11	0	30	100	0	0	0	0	0	0	1	0	7	0	0	1	1
50.2094	0	0	5	1	0	3	#NULL!	1	0	0	196	10	0	5	100	0	1	0	1	0	0	1	0	8	0	1	1	0
64.1615	0	1	20	1	1	4	#NULL!	1	0	0	6	17	0	20	100	1	0	0	0	0	0	1	0	5	0	1	0	1
81.4209	0	1	5	1	1	0	0	1	0	0	54	25	0	5	100	0	0	0	1	0	0	1	0	7	0	0	0	0
83.8111	0	0	5	1	1	2	1	1	0	0	16	14	#NULL!	5	95	0	0	0	0	0	0	1	0	8	1	0	1	1
74.308	0	0	5	0	1	7	3	0	0	0	18	9	0	5	100	1	1	0	0	0	0	1	0	8	0	1	0	0
80.3641	0	1	5	#NULL!	0	3	3	1	0	0	42	14	0	5	95	0	0	0	0	0	0	0	0	8	1	0	0	0
80.5038	0	1	5	1	1	1	0	1	0	0	35	14	0	5	100	0	1	0	1	0	0	1	0	6	1	0	1	1
87.2745	1	1	10	1	0	4	0	1	0	0	33	25	0	10	80	0	0	1	1	0	0	1	0	3	1	0	0	0
87.9042	#NULL!	1	20	0	1	3	#NULL!	#NULL!	0	0	163	13	#NULL!	20	100	0	1	0	1	0	#NULL!	1	0	#NULL!	0	1	#NULL!	1
87.5346	0	1	25	0	0	7	0	1	0	0	72	14	0	25	65	1	0	1	0	1	1	1	0	4	1	0	0	0
77	0	0	25	0	1	1	0	0	0	0	19	2	0	25	100	0	0	0	0	0	0	1	0	6	1	0	0	0
68.4901	0	0	30	0	0	2	0	1	0	0	26	14	0	30	75	0	1	0	1	0	0	1	0	7	1	1	0	0
70.2313	0	1	45	0	1	4	0	0	0	0	70	11	0	45	100	1	1	0	0	0	0	1	0	8	0	0	0	0
85.0842	0	1	80	1	1	0	1	1	0	0	45	7	0	80	100	0	0	0	1	0	0	1	0	5	1	0	0	1
63.332	0	0	65	0	0	12	#NULL!	0	0	0	58	5	0	65	100	0	1	0	1	0	0	1	0	8	0	1	0	0
72.1615	0	0	80	1	0	4	1	0	0	0	72	2	0	80	100	0	1	0	1	0	0	1	0	8	0	1	0	0
88.4298	0	0	#NULL!	0	1	3	2	1	-5	#NULL!	80	10	0	5	100	0	0	1	0	0	0	1	-0.0625	4	0	0	0	0
90.1383	1	1	#NULL!	0	1	3	2	1	-5	#NULL!	186	24	0	5	100	0	0	0	1	0	0	1	-0.0268817	7	0	1	1	1
90.4038	0	1	#NULL!	#NULL!	1	2	2	1	-5	#NULL!	48	10	0	5	100	0	0	0	0	0	1	1	-0.104167	8	0	0	0	0
77.0541	0	1	#NULL!	1	1	1	2	1	-5	#NULL!	75	15	1	5	100	1	0	0	0	0	1	1	-0.0666667	5	1	0	0	0
93.1335	0	1	0	0	1	3	0	0	-5	-0.0526316	42	13	0	5	100	0	0	1	0	0	0	1	-0.119048	4	1	0	0	0
85.0349	0	1	#NULL!	1	1	3	2	0	-5	#NULL!	8	13	0	5	95	1	0	0	0	0	0	1	-0.625	8	1	0	0	1
82.7625	0	1	#NULL!	0	1	3	2	1	-5	#NULL!	231	26	0	5	95	0	0	0	0	0	1	1	-0.021645	6	1	0	0	0
87.4661	0	0	5	0	1	2	0	0	-5	-0.0555556	192	21	0	10	100	0	0	0	0	0	0	1	-0.0260417	5	1	0	0	1
75.6715	0	1	5	1	1	1	#NULL!	1	-5	-0.0555556	2	14	0	10	100	1	0	0	0	0	0	1	-2.5	4	0	0	0	0
61.7577	1	1	5	1	0	2	#NULL!	1	-5	-0.0555556	75	12	0	10	100	0	0	0	0	0	0	1	-0.0666667	6	0	1	0	1
72.7967	0	1	#NULL!	0	1	3	2	1	-5	#NULL!	41	26	0	5	85	1	1	0	1	0	1	1	-0.121951	4	1	0	1	0
80.3422	0	0	5	#NULL!	1	3	3	0	-5	-0.0714286	83	7	0	10	80	0	0	1	1	0	0	1	-0.060241	8	1	0	0	0
78.9322	0	1	#NULL!	#NULL!	0	7	2	1	-5	#NULL!	153	24	0	5	55	1	1	0	0	0	1	1	-0.0326797	3	0	0	1	0
76.3149	1	1	#NULL!	0	1	2	2	1	-5	#NULL!	88	12	0	5	55	0	0	0	0	0	0	1	-0.0568182	5	0	1	0	1
83.1321	0	0	45	0	1	2	1	1	-5	-0.1	21	0	0	50	100	0	1	0	0	0	0	1	-0.238095	8	1	1	0	0
82.0589	0	0	0	1	1	3	1	0	-10	-0.111111	61	9	0	10	100	1	0	0	0	0	0	1	-0.163934	8	1	0	0	0
70.9678	1	1	45	1	1	1	1	1	-5	-0.111111	108	7	0	50	95	0	0	0	1	0	0	1	-0.0462963	8	0	1	0	0
73.4784	0	1	55	0	1	1	1	0	-5	-0.125	27	4	0	60	100	0	0	0	0	0	0	1	-0.185185	6	0	0	0	0
86.2231	0	1	55	0	1	1	1	0	-5	-0.125	58	2	0	60	100	1	0	0	0	0	0	1	-0.0862069	8	1	0	0	0
84.0356	0	1	15	1	1	3	1	0	-10	-0.133333	16	21	0	25	100	0	1	0	0	0	0	1	-0.625	5	0	0	0	0
96.1259	0	#NULL!	#NULL!	0	1	0	2	1	-5	#NULL!	2	23	0	5	40	0	0	0	0	0	0	1	-2.5	1	1	0	0	0
77.3662	0	0	20	1	1	3	1	0	-10	-0.142857	155	16	0	30	100	1	1	0	1	0	0	1	-0.0645161	8	1	0	0	0
79.9617	0	1	55	0	0	0	1	0	-5	-0.142857	95	4	0	60	95	0	0	0	0	0	0	2	-0.0526316	8	1	0	0	0
77.8015	0	0	0	0	1	1	0	1	-10	-0.153846	#NULL!	13	0	10	75	0	0	1	0	0	1	1	#NULL!	5	0	0	1	0
81.5825	#NULL!	0	#NULL!	0	1	5	2	0	-10	#NULL!	5	6	0	10	75	1	1	0	0	0	0	1	-2	4	0	1	0	0
69.306	1	0	0	0	1	3	3	0	-10	-0.153846	47	7	0	10	75	1	0	0	0	0	0	1	-0.212766	8	0	1	0	0
67.5483	1	0	35	1	1	4	#NULL!	0	-10	-0.181818	295	12	0	45	100	1	0	0	0	0	0	1	-0.0338983	8	0	1	0	0
93.4921	0	0	35	0	1	1	0	0	-10	-0.181818	45	0	0	45	100	0	0	0	0	0	0	1	-0.222222	8	0	0	0	1
66.5243	0	0	#NULL!	1	1	3	2	1	-15	#NULL!	11	10	0	15	90	0	1	0	1	0	0	1	-1.36364	7	1	1	0	0
100.797	#NULL!	#NULL!	#NULL!	0	1	1	2	1	-10	#NULL!	29	23	0	10	60	0	0	0	0	0	0	1	-0.344828	3	1	0	0	0
66.8775	0	1	70	1	0	2	1	1	-5	-0.2	62	4	0	75	100	0	1	0	0	0	0	1	-0.0806452	8	1	0	0	0
89.2758	0	1	#NULL!	1	1	7	2	1	-15	#NULL!	117	15	0	15	85	0	0	0	1	0	0	1	-0.128205	8	1	0	0	0
78.7543	0	1	40	1	1	3	1	1	-10	-0.222222	62	2	0	50	95	0	1	0	1	0	0	1	-0.16129	8	1	0	0	0
67.707	1	1	#NULL!	0	0	3	2	1	-15	#NULL!	30	10	0	15	80	0	0	0	1	0	1	1	-0.5	7	0	1	0	0
69.4976	0	0	#NULL!	0	0	4	2	1	-20	#NULL!	118	9	0	20	100	0	1	0	1	0	1	1	-0.169492	8	0	1	0	0
80.3477	0	0	15	0	0	9	3	0	-15	-0.25	131	9	0	30	90	1	1	1	1	0	0	0	-0.114504	7	1	0	0	0
68.3833	0	1	50	0	1	2	1	1	-10	-0.25	27	2	0	60	100	1	1	0	1	0	0	1	-0.37037	8	1	1	0	0
82.8063	0	0	#NULL!	1	1	5	2	0	-20	#NULL!	20	9	0	20	95	1	0	1	1	0	1	1	-1	6	1	0	0	0
78.9295	0	0	0	1	1	1	0	1	-25	-0.333333	#NULL!	8	0	25	100	0	0	0	0	0	0	1	#NULL!	8	0	1	0	0
89.8179	0	0	#NULL!	1	0	2	2	0	-25	#NULL!	12	10	0	25	100	0	0	0	0	0	1	1	-2.08333	8	1	0	0	1
85.7604	0	0	40	1	0	5	1	0	-15	-0.333333	92	4	0	55	100	1	0	0	1	0	0	1	-0.163043	8	0	1	0	1
80.2765	0	1	25	1	1	2	0	0	-20	-0.363636	97	9	0	45	100	0	1	0	0	0	0	1	-0.206186	8	0	0	0	0
60.5585	0	1	0	0	1	4	0	0	-25	-0.454545	156	12	0	25	80	0	1	1	0	0	0	1	-0.160256	8	0	1	0	1
65.3032	1	1	#NULL!	1	1	8	2	0	-30	#NULL!	53	10	0	30	95	1	1	0	1	0	0	1	-0.566038	7	1	1	0	0
80.6982	0	0	25	0	1	1	0	0	-25	-0.555556	54	0	0	50	95	0	1	0	0	0	0	1	-0.462963	7	1	0	0	0
65.8919	0	1	#NULL!	0	0	2	2	0	-15	#NULL!	0	9	0	15	40	0	0	0	0	0	0	1	#NULL!	7	1	0	0	0
77.4757	0	0	#NULL!	1	0	4	2	1	-40	#NULL!	25	4	0	40	100	1	1	0	0	0	0	1	-1.6	7	1	0	0	0
89.065	0	1	5	0	1	1	1	0	-30	-0.666667	25	7	0	35	80	1	0	0	0	0	0	1	-1.2	8	1	0	0	0
72.835	0	0	#NULL!	1	1	9	2	0	-10	#NULL!	19	9	0	10	25	0	1	0	0	0	0	1	-0.526316	8	0	0	0	0
80.2847	0	0	#NULL!	0	1	5	2	0	-40	#NULL!	67	0	0	40	100	1	1	0	1	0	0	1	-0.597015	8	0	0	0	0
82.2368	0	0	50	0	0	1	0	1	-20	-0.666667	56	2	0	70	100	1	0	0	0	0	0	1	-0.357143	5	1	0	0	0
81.692	0	0	#NULL!	1	1	4	2	1	-35	#NULL!	14	5	0	35	85	0	1	0	0	0	0	1	-2.5	2	1	0	0	0
85.232	0	1	0	0	1	2	0	1	-35	-0.777778	#NULL!	8	0	35	80	0	1	0	1	0	1	1	#NULL!	6	0	1	0	0
69.8042	0	0	45	1	1	1	0	1	-25	-0.833333	14	3	0	70	100	0	0	0	0	0	0	1	-1.78571	6	1	0	1	0
91.3292	0	0	15	0	0	1	1	1	-40	-0.888889	68	9	0	55	100	0	0	1	0	0	0	1	-0.588235	6	0	1	0	0
90.4695	0	1	#NULL!	0	0	6	2	0	-30	#NULL!	123	14	0	30	60	0	1	1	0	0	0	1	-0.243902	4	0	0	0	0
79.0856	0	0	65	0	1	5	1	0	-10	-1	28	2	0	75	85	1	1	0	0	0	0	1	-0.357143	8	0	1	0	0
74.3135	0	0	0	1	1	9	3	0	-60	-1.5	31	4	0	60	100	1	1	0	0	0	0	1	-1.93548	8	1	0	0	0
85.3717	#NULL!	#NULL!	5	0	1	3	0	1	-30	-1.5	50	3	0	35	55	1	0	1	0	0	0	0	-0.6	4	1	0	0	1
70.8857	1	1	#NULL!	1	1	2	2	0	-60	#NULL!	26	2	0	60	90	0	0	1	1	0	0	1	-2.30769	8	0	1	0	0
81.7495	0	1	25	0	0	4	#NULL!	0	-50	-2	73	4	0	75	100	1	1	0	0	0	0	1	-0.684932	8	0	1	0	0
69.6427	0	1	#NULL!	0	1	2	2	1	-70	#NULL!	13	4	1	70	100	0	0	1	0	0	1	1	-5.38462	3	0	1	1	0
65.911	1	0	65	1	1	1	1	1	-25	-2.5	74	1	0	90	100	0	0	0	1	0	0	1	-0.337838	8	0	1	0	0
74.141	0	1	0	0	0	2	3	1	-85	-5.66667	49	6	0	85	100	0	1	0	1	0	0	1	-1.73469	8	1	0	0	1
81.6564	0	0	#NULL!	0	1	6	2	1	-70	#NULL!	7	7	0	70	75	1	1	0	1	0	0	1	-10	3	1	0	0	0
52.3176	0	#NULL!	#NULL!	1	#NULL!	1	#NULL!	1	#NULL!	#NULL!	#NULL!	#NULL!	0	#NULL!	#NULL!	0	0	0	0	0	0	1	#NULL!	3	1	1	0	0
89.0075	0	#NULL!	#NULL!	0	#NULL!	0	#NULL!	0	#NULL!	#NULL!	#NULL!	#NULL!	0	#NULL!	#NULL!	0	0	0	0	0	0	1	#NULL!	8	1	0	0	1
66.2313	0	#NULL!	#NULL!	0	1	2	#NULL!	0	#NULL!	#NULL!	#NULL!	8	0	20	30	0	1	1	1	1	1	1	#NULL!	4	1	0	0	0
#NULL!	#NULL!	1	#NULL!	#NULL!	1	#NULL!	#NULL!	#NULL!	#NULL!	#NULL!	#NULL!	14	#NULL!	15	100	#NULL!	#NULL!	#NULL!	#NULL!	#NULL!	#NULL!	0	#NULL!	#NULL!	#NULL!	#NULL!	#NULL!	#NULL!
87.9042	0	1	#NULL!	0	1	3	#NULL!	0	#NULL!	#NULL!	#NULL!	14	0	15	100	0	1	0	1	0	0	1	#NULL!	7	0	1	0	1
73.0267	0	1	#NULL!	1	1	4	#NULL!	1	#NULL!	#NULL!	139	24	0	0	60	0	0	0	0	0	0	1	#NULL!	7	0	1	1	0
80.1342	0	1	#NULL!	1	1	3	#NULL!	0	#NULL!	#NULL!	174	26	0	0	100	0	0	0	1	0	0	0	#NULL!	7	1	0	0	0
77.8727	1	1	#NULL!	1	1	3	#NULL!	1	#NULL!	#NULL!	66	20	0	0	100	0	1	0	1	0	0	1	#NULL!	8	0	1	0	0
78.9405	0	1	#NULL!	0	1	4	#NULL!	1	#NULL!	#NULL!	81	22	#NULL!	0	85	1	0	1	0	0	#NULL!	1	#NULL!	3	0	0	1	1
78.7461	0	1	#NULL!	0	1	6	#NULL!	1	#NULL!	#NULL!	156	21	0	0	85	0	1	1	1	0	0	1	#NULL!	1	1	0	1	0
81.2402	0	1	#NULL!	0	1	2	#NULL!	1	#NULL!	#NULL!	106	22	0	5	100	0	0	0	0	0	1	1	#NULL!	5	1	0	1	1
86.7488	0	#NULL!	50	0	#NULL!	6	1	0	#NULL!	#NULL!	90	#NULL!	0	#NULL!	#NULL!	1	0	0	1	0	0	1	#NULL!	5	1	0	0	0

## Sheet: Hoja1
Variable	Description	Valores
Age
Alcohol		0: No, 1:Yes
Aphasia		0: No, 1:Yes
Barthel at discharge
Begun RHB at acute hospital		0:No, 1: yes
Caregiver presence		0:No, 1: Yes
Charlson Index
Discharge destination		0: institutionalization, 1: home, 2: death, 3: acute hospital
Dysphagia		0: No, 1:Yes
Functional improvement	Barthel at discharge-Post-stroke Barthel
LOS	Length of hospital stay
NIHSS	Stroke severity
PEG	Percutaneous gastrostomy	0:No, 1: Yes
Post-Stroke Barthel
Pre-stroke Barthel
Presure Ulcers	Pressure Ulcers	0:No, 1: Yes
Previous CV disease	Previous Cerebrovascular Disease	0: No, 1:Yes
Previous DBM		0: No, 1:Yes
Previous Dementia		0: No, 1:Yes
Previous DLP		0: No, 1:Yes
Previous Institutionalization		0: No 1: Yes
Referral center		0: missing, 1: Acute Hospital, 2: Intermediate care, 3: Home
Rehabilitation efficiency	Functional improvement/LOS
Relative Functional Gain	Barthel at discharge-Post-stroke Barthel/(Pre-stroke Barthel-Post-stroke Barthel)
RLAS	Rancho Los Amigos Scale
Sex		0: Man, 1: Woman
Smoke		0:No, 1: Yes (actual or previous)
SNG	Nasogastric tube	0:No, 1: Yes
Stroke Type		0: Ischemic, 1: No ischemic
